# Supplementary material for: A DFT-based genetic algorithm search for AuCu nanoalloy electrocatalysts for CO2 reduction
Source: Royal Society of Chemistry journal article supplement (doi:10.1039/c5cp00298b), 2015-01-01
Supplement: c5cp00298b1.pdf [file c5cp00298b1.pdf]

## Supplementary material to “DFT-based genetic algorithm search for AuCu nanoalloy electrocatalysts for CO<sub>2</sub> reduction”

Steen Lysgaard, Jon Steinar Gardarsson Myrdal, Heine A. Hansen and Tejs Vegge

*Department of Energy Conversion and Storage, Technical University of Denmark, Frederiksborgvej 399, DK-4000 Roskilde, Denmark.*

Included in this supplementary material is plots for correcting the LCAO adsorption energies for COOH, CHO and OH against values calculated with the plane wave code DACAPO. As opposed to the CO correction in the main paper, where all LCAO energies were underestimated, we here find errors to both sides. Thus an extra error value is reported here; the mean of the absolute errors (MAE) as well as the average error (AvgE) and the standard deviation (stdev).

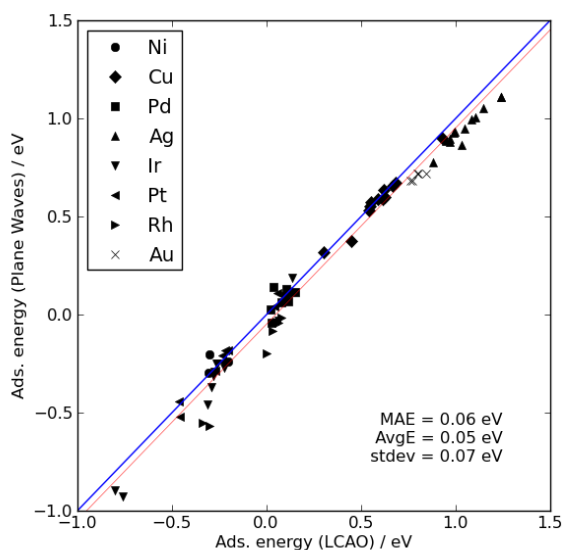

*Figure S1: Adsorption energies of COOH with the plane wave code DACAPO vs. LCAO mode in GPAW*

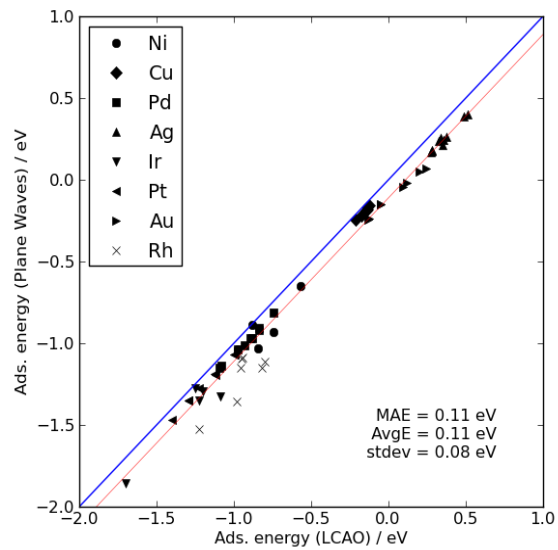

Figure S2: Adsorption energies of CHO with the plane wave code DACAPO vs. LCAO mode in GPAW

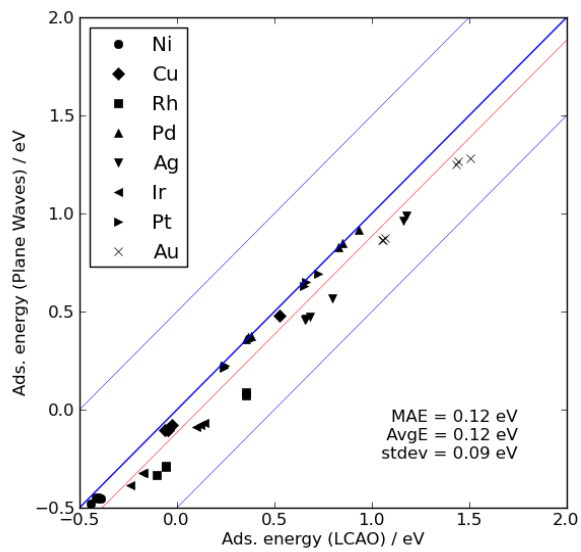

Figure S3: Adsorption energies of OH with the plane wave code DACAPO vs. LCAO mode in GPAW
